# Supplementary material for: Bio-Inspired Systems in Nonsurgical Periodontal Therapy to Reduce Contaminated Aerosol during COVID-19: A Comprehensive and Bibliometric Review
Source: J Clin Med. 2020 Dec 2;9(12):3914. doi: 10.3390/jcm9123914 (PMC7761598; doi:10.3390/jcm9123914)
Supplement: Supplementary file 1 [file jcm-09-03914-s001.xlsx]

## Sheet: Table S1
Table 1. Non surgical periodontal therapy and laser
Title				Authors			Year		Evidence		Source				P (Problem)				I (Intervention)			C (Control)			O (Outcomes)			Clinicalparameters				Others parameters				Follow-up
The effect of low-level laser therapy as an adjunct to non-surgical periodontal treatment on gingival crevicular fluid levels of transforming growth factor-beta 1, tissue plasminogen activator and plasminogen activator inhibitor 1 in smoking and non-smoking chronic periodontitis patients: A split-mouth, randomized control study.				Pamuk F, LütfioğluM, Aydoğdu A, Koyuncuoglu CZ, Cifcibasi E, BadurOS.			2017		RCT in split-mouth		Pubmed				60 patients with generalized chronic periodontitis with (1) ≥35 years of age and having ≥16 teeth , (2) no periodontal therapy in the 6 months, (3) no systemic problems or chemotherapy within the 6 weeks before, (4) no medical history of cancer, rheumatoid arthritis, diabetes mellitus or cardiovascular disease, (5) no compromised immune system, (6) no pregnancy, menopause or lactation, (7) ongoin…				Cp/SRP+sham (n=15, split-mouth): non-smokers with chronic periodontitis receiving SRP only			C (n=15): periodontally healthy non-smoking age-/gender-matched control group			All clinical parameters showed significant reductions between baseline and day 30 following SRP treatment in both the LLLT and sham groups (P<.001). No signifi- cant differences were observed between the LLLT and sham groups of either the smokers or non-smokers (P>.05). Gingival crevicular fluid PAI-1 levels decreased sig- nificantly in the SCp+SRP+sham and SCp+SRP+LLLTgroups (P<.05), and gingiva…			CAL (primaryoutcomevariable), PPD, PI, GI, BOP				GCF				3 months
																			Cp/SRP+LLLT (n=15, split-mouth): non-smokers with chronic periodontitis receiving SRP and LLLT			SC (n=15): periodontally healthy smoking age-/gender-matched control group
																			SCp/SRP+sham (n=15, split-mouth): smokers with chronic periodontitis receiving SRP only
Efficacy of Er:YAGlaser on periodontitis as an adjunctive non‐surgical treatment: A split‐mouth randomized controlled study				Zhou X, Lin M, Zhang D, Song Y, Wang Z.			2019		RCT single-blinded (treatment procedures using random sequences generated by the Microsoft® Excel software application ; allocation concealment was performed by opaque sealed envelopes, sequentially numbered)		Pubmed				27 (analyzed for 3 month and 25 patients analyzed for 6 months; a total of 2t patients was analyzed) systematically healthy periodontitis patients with (1) a minimum a minimum of 16 teeth (four for quadrant), (2) at least two teeth with at least one site with PD ≥ 4 mm in each quadrant with bleeding on probing, (3) 35–70 years old, (4) non-smoker, (5) no periodontal treatment within the previous …				SCp/SRP+LLLT (n=15, split-mouth): smokers with chronic periodontitis receiving SRP and LLLT
																						Control group: SRP			The PD and CAL means in the ERL + SRP group were significantly lower than those in the SRP group at 3‐month follow‐up (PD: 2.98 ± 0.38 mm vs. 3.09 ± 0.35 mm; CAL: 4.51 ± 0.69 mm vs. 4.72 ± 0.67 mm) and 6‐month follow‐up (PD: 2.91 ± 0.31 mm vs. 3.02 ± 0.30 mm; CAL: 4.52 ± 0.65 mm vs. 4.72 ± 0.66 mm; p = 0.03 for both PD and CAL). There were no significant differences in BI and PLI between two grou…			PPD, CAL (primary outcomes variables) BI, PI				None				6 months
Clinical and microbiologic follow-up evaluations after non-surgical periodontal treatment with erbium:YAG laser and scaling and root planing.				Lopes BM, TheodoroLH, Melo RF, Thompson GM, Marcantonio RA.			2010		RCT (allocation concealment was performed by a computer-generate table)		Pubmed				19 patients with (1) 4 non-adjacent sites in different quadrants with BOP and PD from 5 to 9 mm, (2) no periodontal treatment within the last 12 months, (3) no systemic disease that could influence the outcome of periodontal therapy, (4) no use of antibiotics within the last 6 months, (4) no use of anti-inflammatory drugs within the last 3 months, (5) no pregnancy or use of hormone contraceptives…							Control group: no treatment			GI decreased for SRPL and increased for L, SRP, and C (P <0.05) 12 days postoperatively and decreased for SRPL and SRP (P <0.05) 3, 6, and 12 months after baseline; BOP and PD decreased for all treated groups (P <0.01) 3, 6, and 12 months after treatment. CAL gain was significant for SRPL, L, and SRP (P <0.05) 3, 6, and 12 months postoperatively. SRPL and L presented a significant reduction in th…			CAL (primaryoutcomevariable), PPD, PI, GI, BOP, GR				Microbiologicalanalysis				1 year
Evaluation of the clinical and antimicrobial effects of the Er:YAG laser or topical gaseous ozone as adjuncts to initial periodontal therapy.				Yılmaz S, Algan S, Gursoy H, Noyan U, Kuru BE, Kadir T.			2013		RCT (allocation concealment was performed by a computer-assisted randomization table)		Pubmed				30 patients systematically healthy chronic periodontitis. (1) no periodontal or antimicrobial treatment within the past 6 months, (2) no pregnancy, (3) the presence of at least four teeth having at least one approximate site with a probing depth of ≥ 5 mm and a sulculusbleeding index of ≥ 2 mm in each quadrant, and (4) no smoking.				Test group: SRP + laser Er:YAG			Control group 3: SRP			Statistically significant improvements in clinical parameters were observed within in each group. Parallel to te clinical changes, al treatments reduced the number of total bacteria and the proportion of obligately anaerobic microrganisms.			PI, SBI, PPD, RAL(CAL)				Microbiologicalanalysis (TVC)				3 months
Clinical Efficacy of Subgingival Debridement With Adjunctive Er:YAG Laser in Chronic Periodontitis Patients. A RandomisedClinical Trial				Sanz-Sánchez I, Ortiz-Vigón A, MatosR, Herrera D, SanzM.			2014		RCT single-masked and parallel group (treatment regimens by means of a computer generated random list; allocation concealment was performed through the use of opaque sealed envelopes and masking was assured by having a study coordinator)		Pubmed				40 patients with chronic periodontitiwith (1) at least 4 teeth per quadrant with PD 4 mm and radiographic bone loss between 30-50% in more than 30% of teeth (2) no systemic diseases requiring antibiotic prophylaxis or other systemic medication, (3) periodontal treatment within the last 12 months or systemic antibiotic intake in the last 3 months.				Test group (I SRPL): SRP + Er:YAG laser. Test group (II L): Er:YAG. Test group (III SRP): SRP			Control group: full-mouth debridement			Both treatments resulted in significant clinical improvements. The test group achieved, in comparison with the control, significantly lower percentage of sites with PD ≥4.5 mm (17.44% versus 22.83%, respectively; p=0.004) and a tendency to lower percentage of PD ≥4.5 mm with bleeding on probing (9.78% versus 12.69%, respectively; p=0.052)			PPD (primary outcome variable), REC, CAL, BOP Plaque absence/presence				None				1 year
The effect of low-level laser therapy on non-surgical periodontal treatment: a randomized controlled, single-blind, split-mouth clinical trial.				Gündoğar H, ŞenyurtSZ, Erciyas K, YalımM, Üstün K.			2016		RCT single-blinded in split-mouth (treatment was determined by a coin flip randomization technique)		Pubmed				25 systematically healthy and non-smoking patients with generalized chronic periodontitis with (1) aged 18 years and above, (2) at least 2 bilateral premolars with PPD ≥ 5 mm, (3) no pregnant or acting, (4) no antibiotics, anti-inflammatory drugs, hormones or immunosuppressive agent during the 6 months prior, (5) no dental treatment during the last 1 year.				Test group 1: SRP + Er:YAG laser. Test group 2: SRP + topical gaseous ozone.			Control group: full-mouth			In the first month, PPD levels were significantly (p <0.05) lower in the SRP + LLLT group than in the SRP group. At the third and sixth months, CAL, PPD and GI were significantly (p <0.05) lower in the SRP + LLLT group than in the SRP group. The differences in GCF cytokine levels in the group were not statistically significant.			GI, PPD, PI, CAL				GCF				6 months
Combined application of Er:YAG and Nd:YAG lasers in treatment of chronic periodontitis. A split-mouth, single-blind, randomized controlled trial.				Sağlam M, KöseoğluS, Taşdemir I, ErbakYılmaz H, Savran L, Sütçü R.			2017		RCT single-blinded in split-mouth (therapy allocation was done by flipping a coin)		Pubmed				25 systematically healthy and non smokers patients with (1) ≥4 teeth per quadrant with a probing depth of ≥5 mm, clinical attachment level of ≥4 mm, and radiographic signs of alveolar bone loss; also BOP at >80% of the proximal sites, (2) no periodontal treatment over the last 1 year, (3) no systemic diseases that could influence the outcome of the therapy, (4) no pregnancy, (5) immunosuppressive…				Test group: full mouth debridement + Er:YAG			I heads) Control group (right side): SRP. II tails) Control group: SRP (left side)			The clinical parameters had significantly improved for both groups after treatment. There were statistically significant differences in probing depth and clinical attachment level between the test and control groups only for deep pockets (≥7 mm) (P<.05). No significant differences between the two groups were observed for the biochemical and microbiological parameters at any time points (P>.05).			CAL (primaryoutcomevariable), PPD, PI, GI, BOP				GCF and subgingival plaque sampling				3 months
Management of Chronic Periodontitis Using Chlorhexidine Chip and Diode Laser-A Clinical Study				Jose KA, AmbookenM, Mathew JJ, IssacAV, Kunju AP, Parameshwaran RA			2019		RCT single-blinded (randomization was done by chit method)		Pubmed				15 patients with (1) presence of a minimum of 15 teeth, (2) one interproximal site with probing pocket depth measuring 5mm-7mm in each quadrant, (3) non-smokers, (4) no systemic disease, (5) no surgical or non surgicalperiodontal treatment within 6 months, (6) no antibiotics chemotherapeutic mouth rinses within the last 6 months, (7) no hypersensitivity to chlorhexidine.				Test group: full-mouth + LLT			Control group: SRP			Post-treatment, the test and control sites showed a statistically significant reduction in PI, GI, PPD, and CAL. After three months, a mean PPD reduction of 1.47±0.52 mm in control group, 1.40±0.83 mm in diode laser group, 2.67±0.62 mm in CHX group, and 2.80± 0.77 mm in combination group was seen. The mean gain in CAL were 1.47±0.52 mm in the control group, 1.40±0.83 mm in diode laser group, 2.67…			PI, GI, PPD, CAL				None				3 months
The application of antimicrobial photodynamic therapy (aPDT, 670 nm) and diode laser (940 nm) as adjunctive approach in the conventional cause-related treatment of chronic periodontal disease: a randomized controlled split-mouth clinical trial.				Katsikanis F, StrakasD, Vouros I.			2019		RCT in split-mouth (treatment was assigned using a randomization chart)		Pubmed				21 systematically healthy patients with moderate to severe periodontitis with (1) the presente of f 3 or more quadrants in the oral cavity, each containing at least three sites with PPD of ≥ 5mm, (2) age ≥20, (3) light to moderate smokers (< 10 cigarettes/day), (4) no medication affecting healing of periodontal and peri-implant tissues in the last 6 months, (5) no pregnancy or lacting, (6) no sur…				I heads) Test group (left side): SRP +lasers Er:YAG + Nd:YAG. II tails) Test group: SRP + Er:YAG + Nd:YAGlasers (right side)			Control group: SRP			All treatment modalities in this study lead to statistically significant improvements in the evaluated clinical parameters at 3 months and 6 months compared with baseline. There was no statistically significant difference regarding PD and BOP between groups. There was only a tendency for greater reduction of PD in the diode group for deep pockets at 3 months, but not statistically significant			PPD (primary outcome variable), CAL, BOP, PI				None				6 months
Efficacy of adjunctive photodynamic therapy in the treatment of generalized aggressive periodontitis: A randomized controlled clinical trial.				Borekci T, Meseli SE, Noyan U, Kuru BE, Kuru L.			2018		RCT in parallel (treatment was assigned using a computer-generated table)		Pubmed				24 with GAgP. (1) aged ≤ 35, (2) ≥ 20 teeth, (3) ≥ 8 teeth of rich 3 of them not being the first molars or incisors with PD ≥ 5 mm and CAL ≥ 3 mm, (4) interproximal bone loss on radiographic examination, (5) systematically healthy, (6) non-smokers, (7) no periodontal treatment within the last 6 months, (8) no antibiotics, anti-inflammatory drugs or any other medication taken within the last 6 mon…				Test group (I) SRP + diode laser. Test group (II) SRP + CHX chip. Test group (III) SRP + diode laser + CHX chip			Control group: NPT			Clinical and microbial parameters declined significantly in both groups after the treatments (P < 0.01). The comparisons between the groups showed that only the full mouth SBI score of the test group was significantly lower than the control group on day 63 (P < 0.05). Although the reduction in periodontopathogens of the test group was greater than the control group, there was no significant diffe…			PPD (primary outcome variable), RAL, PI, SBI, REC, Tooth mobility				Microbiologicalanalysis				63 days
Clinical and Microbiological Effects of Photodynamic Therapy Associated with Non-surgical Treatment in Aggressive Periodontitis.				Chitsazi MT, Shirmohammadi A, Pourabbas R, Abolfazli N, FarhoudiI, Daghigh Azar B, Farhadi F.			2014		RCT examiner-blind in split- mouth		Pubmed				24 patients with aggressive periodontitis with (1) minimum of 12 teeth with at least 3 teeth in each quadrant with PD ≥4 mm, (2) no periodontal treatment and antibiotic use within the last 6 months , (3) no systemic disease affecting periodontal status, (4) smoking, (5) no pregnancy.				Test group (I): SRP + diode laser. Test group (II): SRP + PDT			Control group: SRP			Treatment groups showed an improvement in all the clinical parameters and a significant reduction in the counts of A. actinomycetecommitans at 90 days compared to baseline (P < 0.05). None of the periodontal parameters exhibited significant differences between the two groups (P > 0.05).			CAL (primary outcome variable), PPD, BOP, PI, REC				None				3 months
Clinical effectiveness of diode laser therapy as an adjunct to non-surgical periodontal treatment: a randomized clinical study.				Dukić W, Bago I, Aurer A, Roguljić M.			2013		RCT single-masked in split-mouth (each quadrant and patient was coded with letters and numbers, and the quadrants were randomized by chance drawing of numbered/coded envelopes)		Pubmed				35 patients with chronic periodontitis with (1) no periodontal treatment within the previous 12 months, (2) o use of antibiotics within the previous 6 months , (3) no systemic disease that could influence the outcome or progression of periodontal therapy, (4) no use of anti- inflammatory drugs within the past 3 months, (5) no pregnancy, (6) no use of hormonal contraceptives, (7) no smokers, alcoh…				Test group: NPT + PDT			Control group: full-mouth (CG)			The results were similar for both groups in terms of API, BOP, PD in deep pockets, and CAL. The laser group showed only significant PD gain in moderate pockets during the baseline to 18-week (P <0.05) and 6- to 18- week (P <0.05) periods, whereas no difference was found between LG and CG in the remaining clinical parameters (P >0.05).			API, BOP, CAL, PPD				None				18 weeks
Clinical and microbiological evaluation of high intensity diode laser adjutant to non-surgical periodontal treatment: a 6-month clinical trial.				Euzebio Alves VT, de Andrade AK, ToaliarJM, Conde MC, Zezell DM, Cai S, Pannuti CM, De Micheli G.			2012		RCT double-blinded in split-mouth (treatment was assigned by tossing a coin)		Pubmed				36 patients with severe chronic periodontitis with (1) at least ten teeth present, vital single-rooted teeth with contra-laterals of the same arch, with a minimum probing depth (PD) of 5 mm or more, (2) no tobacco smokers or alcohol- or drug-dependent, (3) no periodontal treatment or antibiotics in the previous 6 months, (4) no systemic pathologies or conditions which could act as modifying facto…				Test group: SRP + PDT			Group control: SRP			There was a significant improvement of all the clinical parameters—clinical attachment level (CAL), probing depth (PD), plaque index (PI) and Bleeding on Probing (BOP)—for both groups (P < 0.001), with no statistical difference between them at the 6 weeks and the 6 months examinations. As for microbiological analysis, a significant reduction after 6 weeks (P>0.05) was observed as far as colony fo…			CAL (primary outcome variable), PPD, CEJ-GM, PI, BOP				Microbiologicalanalysis				6 months
Adjunctive effect of a water-cooled Nd:YAG laser in the treatment of chronic periodontitis.				Slot DE, KranendonkAA, Van der ReijdenWA, Van WinkelhoffAJ, Rosema NA, Schulein WH, Van der Velden U, Van der Weijden FA.			2011		RCT examiner-blind in split-mouth (Randomization was based on a predetermined computer-generated set of random numbers The primary investigator and study coordinator was responsible for concealing the allocation. Sealed envelopes were prepared that stated which quadrants would receive additional laser treatment.		Pubmed				19 health patients with moderate and/or sever chronic periodontitis with (1) at least 30 years of age, (2) a minimum of five natural teeth in every quadrant, (3) presence of ≥ 1 site per quadrant with PD > 6 mm and inter-proximal attachment loss of ≥ 3 mm, presence of BOP and radiographic evidence of alveolar bone loss, (4) no professional periodontal therapy before, (5) no antibiotics use for an…				Test group: SRP + diode laser (LG)			Group control: SRP			At the 3-month visit, the clinical parameters had significantly improved for both regimens. No significant differences between treatment modalities were observed for any of the clinical parameters at any time. Immediately following instrumentation, the total colony forming units for both groups were significantly reduced as compared with pre-instrumentation. No significantdifferences betweentreat…			PPD, BOP (primary outcome variables), PI				Microbiologicalanalysis				3 months
Clinical and microbiological evaluation of the synergistic effects of diode laser with nonsurgical periodontal therapy: A randomized clinical trial.				Manjunath S, Singla D, Singh R.			2020		RCT (treatment was assigned by tossing a coin)		Pubmed				40 patients with chronic periodontitis with (1) moderate periodontal pockets, (2) minimum of 20 teeth, (3) no periodontal treatment within past 6-12 months, (4) no antibiotics or anti-inflammatory within past 3-6 months, (5) no pregnant and acting, (6) no taking hormonal contraceptives, (7) no smokers, (8) no alcoholics.				Test group: SRP + diode laser			Group control: full-mouth + SRP			There was reduction in BOP, PPD, and gain in CAL from baseline to 3 months and also a reduction in CFU 1 week postoperatively.			OHIs,CAL, PPD, BOP				Microbiologicalanalysis				3 months
Adjunctive effects of laser therapy on somatosensory function and vasomotor regulation of periodontal tissues in patients with periodontitis- A randomized controlled clinical trial.				Gou H, Fan R, Chen X1,2, Li L, Wang X, Xu Y, Svensson P, Wang K.			2020		RCT in split-mouth (treatment was assigned according to a computer-generated randomization list)		Pubmed				24 patients with periodontitis stage II, III with grades B or C with probing depths>5 mm in at least one site in each maxillary quadrant, and radiologically-detectable alveolar bone loss in all quadrants.				Test group: SRP + Nd:YAG			Control group: SRP			The PPD and BOP significantly improved after treatment (P <0.001). There were no statistically significant differences between test and control group.			PPD, BOP				LDF and QST (Laser Doppler Flowmetry; Quantitative Sensory Testing)				4 weeks.
Efficacy of scaling and root planning with and without adjunct Nd:YAGlaser therapy on clinical periodontal parameters and gingival crevicular fluid interleukin 1-beta and tumor necrosis factor-alpha levels among patients with periodontal disease: A prospective randomized split-mouth clinical study.				Abduljabbar T, Vohra F, Kellesarian SV, Javed F.			2017		RCT in split-mouth (maxillary and mandibular premolars and molars were assigned to treatment by tossing a coin)		Pubmed				28 patients with (1) PD (at least 30% sites with BOP and PD ≥ 4 mm, (2) no smoking, (3) no habitual alcohol consumption, (4) no systemic diseases, (5) no antibiotics within the past 3 months, (6) no periodontal treatment within the past 6 months, (7) no lasting and/of pregnant females				Test group: full-mouth SRP + diode laser			Control group: SRP			In the control- sites at 3-month follow-up, PI and BOP were statistically significantly higher compared with the test-sites at 3- and 6-month follow-up. n the test-sites, there was no statistically significant difference in PI and BOP at 3- and 6-month follow-up (. The mean PPD in the test- and control-sites was statistically significantly higher at baseline as compared to the re-spective sites a…			PI, BOP, PPD				GCF				6 months
Photodynamic therapy associated with full-mouth ultrasonic debridement in the treatment of severe chronic periodontitis: a randomized-controlled clinical trial.				Balata ML, AndradeLP, Santos DB, Cavalcanti AN, Tunes Uda R, Ribeiro ÉdelP, Bittencourt S.			2013		RCT blinded in split-mouth (treatment was assigned by tossing a coin)		Pubmed				22 patients with sever chronic periodontitis with (1) CAL ≥ 5 mm, BOP and radiographic bone loss, (2) minimum of 2 teeth with PD ≥ 7 mm and 2 other teeth with a PPD ≥ 5 mm, all with BOP and located on opposite sides of the mouth, (3) ≥ 16 teeth in both jaws, (4) systemic diseases, (5) no periodontal treatment in preceding 6 months, (6) no consumption of antibiotic, anti-inflammatory, anticonvulas…				Test group: SRP + Nd:YAG			Control group: SRP			An improvement in BOP, PD and CAL was observed after treatment, in both groups, but without any difference between them. After 6 months, the PD decreased from 5.11±0.56 mm to 2.83±0.47 mm in the test group (p<0.05) and from 5.15±0.46 mm to 2.83±0.40 mm in the control group (p<0.05). The CAL changed, after 6 months, from 5.49±0.76 mm to 3.41±0.84 mm in the test group (p<0.05) and from 5.53±0.54 to…			CAL (primary outcome variable), PPD, VPI, GBI, BOP, GR				None				6 months
Comparison between scaling-root-planing (SRP) and SRP/photodynamic therapy: six-month study.				Berakdar M, Callaway A, EddinMF, Ross A, Willershausen B.			2012		RCT in split-mouth (treatment was decided using a randomization list)		Pubmed				22 patients with chronic periodontitis with (1) four teeth having at least one site with a probing depth of five mm and presence of bleeding on probing, (2)no systemic disease, (3) no treatment with antibiotics within the last six months, (4) no pregnancy, (5) no smoking				Test group: SRP + Nd:YAG			Control group: SRP			Both therapies lead to a significant reduction the number of teeth positive when tested for bleeding on probing. The scores for PI were similar for both therapy forms. Both therapies lead to a recognizable improvement of CAL values, with the combined therapy achieving a slightly higher gain in clinical attachment and a clear improvement in the measured probing depths.			PPD, CAL, BOP, REC, GI, PI				None				6 months
Efficacy of antimicrobial photodynamic therapy in the management of chronic periodontitis: a randomized controlled clinical trial.				Betsy J, Prasanth CS, Baiju KV, PrasanthilaJ, Subhash N.			2014		RCT (treatment was assigned according to block randomization; allocation sequence was generated using a Tippet’s 2- digit random number table and the allocations were concealed in opaque sealed envelopes which were sequentially numbered)		Pubmed				88 patients with chronic periodontitis, (1) PPD between 4-6 mm at least in two different quadrants of the mouth, (2) a minimum of 20 teeth, (3) age between 18 to 65 years, (4) single rooted teeth, good general health without any signs of systemic disease, (5) no use of antibiotics, (6) no pregnant or lacting, (7) no smoking, (8) no allergic to methylene/toduline				Test group: SRP + PDT			Control group: SRP			As compared to control group, PPD and CAL showed statistically significant reduction in the test group at 3 months and 6 months. A statistically significant improvement in gingival index and gingival bleeding index was seen for the test group after 2weeks and 1 month of aPDT, whereas the improvement in gingival index and gingival bleeding index at 3 months and in plaque index at 2 weeks after aPD…			PPD (primary outcome variable), CAL, GI, GBI, PI				Halitosis				6 months
Clinical effects of photodynamic therapy as an adjunct to full-mouth ultrasonic scaling and root planing in treatment of chronic periodontitis.				Bundidpun P, Srisuwantha R, Laosrisin N.			2018		RCT in split-mouth (computerized randomly allocated to the control or the test group)		Pubmed				20 patients with generalized moderate to severe chronic periodontitis with (1) at least 20 teeth, (2) at least one molar tooth in each quadrant with a minimum of four teeth, (3) at least two teeth and one molar tooth presented with PD 6 ≥ mm in each quadrant, (4) no systemic illness, (5) no pregnancy or lactation, (6) no smoking or alcoholism, (7) no allergy to photosensitized, (8) no periodontal…				Test group: SRP + PDT			Control group: SRP			All periodontal parameters were significantly improved in both groups at 1 month, 3 and 6 months after treatment. All parameters in test group were better than that control group, with statistically significant differences of GBI and GI (P < 0.05) at 3 and 6 months after treatment but no statistically sig- nificant differences of PD, CAL and PI.			PPD, CAL, PI, GBI, GI				None				6 months
The efficacy of Er,Cr:YSGG laser supported periodontal therapy on the reduction of peridodontaldisease related oral malodor: a randomized clinical study				Dereci Ö, HatipoğluM, Sindel A, TozoğluS, Üstün K.			2016		RCT double-blind (allocation was performed by random number generation in Microsoft Excel)		Pubmed				60 patients with chronic periodontitis (1) with 5 mm or greater pocket depth in at least 2 teeth, (2) older than 18 years old, (3) no administration of antibiotics in 6 month period before treatment, (4) no history of previous periodontal therapy, (5) at least 15 teeth present, (6) no systemic diseases, (7) no deep carious teeth				Test group: SRP + aPDT			Control group 1: SRP			There was a statistical significant reduction in VSC values in group 2 at post-treatment 3rd and 6th months (p < 0.05). Pocket depth values at post-treatment 1st month and bleeding on probing values at post-treatment 3rd and 6th months were significantly decreased in group 2 (p < 0.05). Intragroup statistical analysis revealed that there were statistically significant differences for all paramete…			PI, PPD, CAL, BOP				Halitosis				6 months
Clinical effects of photodynamic and low-level laser therapies as an adjunct to scaling and root planing of chronic periodontitis: A split-mouth randomized controlled clinical trial.				Malgikar S, Reddy SH, Sagar SV, Satyanarayana D, Reddy GV, JosephinJJ.			2016		RCT triple blinded in split-mouth (allocation was performed using a computer-generated random numbers)		Pubmed				24 patients with chronic periodontitis with (1) 18-60 years, (3) at least 20 teeth, (4) at least one site in each quadrant of the mouth having PPD ≥ 5 mm and radiographic sings of alveolar bone loss, (5) no pregnant of lacting, (6) no smoking and/or alcohol consumption, (7) no antibiotics within 6 months, (8) no periodontal treatment within last 6 months, (9) no systemic disease				Test group: SRP + PDT			Control group I: SRP.			Within each group, significant improvements (P < 0.001) were found for all variables in 6-month follow-up compared with baseline. The improvement in clinical parameters was significantly greater in Group III compared to Group I and Group II. The mean PD (mm) reduction from baseline to 6 months in Group I was 2.50 ± 0.54, Group II was 2.57 ± 0.53, and Group III was 3.14 ± 0.50. The mean CAL (mm) g…			PI, GI, SBI, PPD, CAL				None				6 months
Clinical and biochemical effects of erbium, chromium: yttrium, scandium, gallium, garnet laser treatment as a complement to periodontal treatment.				Üstun K, HatipogluM, Daltaban O, FelekR, Firat MZ.			2018		RCT in parallel (treatment was assigned by tossing a coin)		Pubmed				40 patients with chronic periodontitis with (1) at least 2 teeth with PPD ≥5 mm included in every quadrant (2) presence at least 14 teeth, (3) no systemic diseases that may influence the periodontal therapy outcome, (4) no smoking, (5) no dental treatment in the past 6 months or antibiotic medication.				Test group 2: Er,Cr:YSGG + SRP			Control group: SRP			After periodontal treatment, CAL, PD, BOP, GI, and PI, which are clinical parameters analyzed, decreased significantly (P < 0.05) in both test and control groups. GCF volume, IL‐1 β, IL‐6, and IL‐35, levels in both groups proved statistically significant reductions compared to the baseline (P < 0.05), but no substantial variations were detected among both groups.			CAL, PPD, BOP, GI, PI				GCF				6 months
Clinical and biochemical effects of 810 nm diode laser as an adjunct to periodontal therapy: a randomized split-mouth clinical trial.				Üstün K, Erciyas K, Sezer U, Şenyurt SZ, Gündoğar H, ÜstünÖ, Öztuzcu S.			2014		RCT single-blinded in split-mouth (treatment was assigned by tossing a coin)		Pubmed				19 patients with generalized chronic periodontitis: (1) presence of at least two incisors or canines at two quadrants (mandible or maxilla) with periodontal pocket depths between 4 and 7 mm, (2) no history of any systemic disease that could affect the periodontal therapy, (3) no smokers, (4) no dental treatment in the past 6 months, (5) no antibiotic medication in the past 6 months.				Test group II: SRP + PDT. Test group III: SRP + PDT + LLT			Control group: SRP			There were no significant differences between the SRP and laser group and the SRP group in any evaluated parameter at baseline. In the 1st month PPD, GI, GCF volume and IL -1 β levels were significantly lower in the SRP and laser group than in the SRP group. At the 3rd and 6th month were observed the same.			PPD, CAL, PI, GI				GFC				6 months
Clinical and Microbiological Effects of the Use of Erbium: Yttrium-Aluminum-Garnet Laser on Chronic Periodontitis in Addition to Nonsurgical Periodontal Treatment: A Randomized Clinical Trial-6 Months Follow-Up.				Zengin Celik T, Saglam E, Ercan C, Akbas F, NazarogluK, Tunali M.			2019		RCT single-blinded (patients were randomly divided into two groups by an independent researcher using a computer-assisted randomization table; the allocation was concealed in sequentially numbered opaque envelopes by the researcher)		Pubmed				38 (analyzed but 2 patients did not show-up at the 6-months recall visit; they weren’t excluded from analysis) patients with moderate and advanced chronic periodontitis with (1) age between 25 -58 years, (2) no systemic disease, (3) never smokers, (4) at least 16 teeth with at least 4 teeth in each quadrant, (5) at least 4 periodontal pockets with a PD ≥ 5 mm, (6) never undergone SRP or periodont…				Test group: SRP + Er, Cr:YSGG			Control group: SRP			All clinical parameters significantly improved 3 and 6 months after treatment in both groups. In the deep and moderately deep pockets, PD reduction and CAL gain between baseline and 6 months were significantly different between the groups (p<0.05). There were no statistically significant differences regarding BOP and PI between the groups. There were no statistically significant differences in Pg…			CAL PPD, PI, BOP				Microbiologicalanalysis				6 months
Antimicrobial photodynamic therapy as adjunct to non-surgical periodontal treatment in smokers: a randomized clinical trial.				de Melo Soares MS, D'Almeida Borges C, de MendonçaInvernici M, Frantz FG, de FigueiredoLC, de Souza SLS, Taba M Jr, MessoraMR, Novaes AB Jr.			2019		RCT double-masked in split-mouth (allocation sequence was performed using a permuted block design with a computer random-number generator; the allocation sequence was concealed in opaque, sealed envelopes)		Pubmed				20 patients with chronic periodontitiwith (1) inter proximal periodontal pockets ≥ 5 mm in contralateral teeth, (2) smoking ≥ 10 cigarettes per day, (3) good general health, (4) no antibiotics in the last 6 months, (5) no periodontal treatment in the last 6 months, (6) no systemic involvement, (7) no antibiotic prophylaxis, (8) no long-term administration one anti-inflammatory drugs, (9) no pregn…				Test group: SRP + diode laser			Control group: SRP			aPDT as an adjunct to SRP did not demonstrate statistically significant advantages on clinical parameters when compared with SRP alone. No statistic significant differences between groups were observed (p < 0.05). Levels of anti-inflammatory cytokines and bacterial species were comparable in both groups at day 90 after treatment.			CAL (primary outcome variable), PPD, PI, BOP, MB,				Microbiologicalanalysis				3 months
Laser reduction of specific microorganisms in the periodontal pocket using Er:YAG and Nd:YAG lasers: a randomized controlled clinical study.				Grzech-Leśniak K1, Sculean A2, GašpircB3.			2018		RCT prospective		Pubmed				60 patients with generalized chronic periodontitis with (1) periodontal pockets of 5 mm or deeper at single-rooted teeth, (2) no periodontal treatment, intake of antibiotics within the last 12 months, (3) pregnancy, (4) no diabetes, (5) no smoking.				Test group: SRP + Er:YAG laser (SRP + L)			Control group (I): SRP			The combined NdErNd laser (93.0%), followed closely by Er:YAGlaser (84.9%), treatment resulted in the highest reduction of all bacteria count after 6 months, whereas SRP (46.2%) failed to reduce Treponema denticola, Peptostreptococcusmicros, and Capnocytophagagingivalis. Full-mouth plaque and bleeding on probing scores dropped after 6 months and were the lowest in both laser groups. The combinati…			CAL (primary outcome variables) FMPS, BOP, PPD, REC,				Microbiological analysis (bacteria count is primary outcome variable)				6 months
Clinical, microbiological and cytomorphometricevaluation of low-level laser therapy as an adjunct to periodontal therapy in patients with chronic periodontitis.				Petrović MS, Kannosh IY, MilašinJM, Mihailović DS, Obradović RR, Bubanj SR, Kesić LG.			2018		RCT prospective (treatment was assigned using numbered containers)		Pubmed				60 patients systematically healthy subjectswithgeneraliczedchronic periodontitis: (1) at least 24 teeth) , (2) radiographic evidence of bone loss, (3) probing pocket depth from 3,5 to 5,5 mm, (4) CAL ≥ 2 mm, (5) presence of supra- and sub gingival plaque and calculus deposits, (6) no history of antibiotic administration within the last 3 months, (7) no systemic illness, acute or chronic infection…				Test group: SRP + aPDT			Control group: SRP			The value of PI in the SRP group was significantly higher than the LLT+SRP group. The values of BI between groups were significantly lower in the LLT+SRP compared with the SRP group. The statistically significantly lower values of CAL were noticed a month after therapy in both group.			PI, BI, CAL (CAL primaryoutcomevariable)				Microbiological evaluation and cytomorphometricanalysis				1 month
The Effects of Diode Laser Therapy as an Adjunct to Scaling and Root Planingin the Treatment of Aggressive Periodontitis: A 1-Year Randomized Controlled Clinical Trial.				Matarese G, Ramaglia L, Cicciù M, Cordasco G, Isola G.			2017		RCT prospective and double-blinded in split-mouth (randomization was done using a random quadrant allocation sequence by a ratio of 1:1 using a permuted block design by a computer random-number generator; the allocation was performed through serially numbered sealed envelopes)		Pubmed				31 patients with a diagnosis of GAgPwith (1) good general health, (2) radiographic evidence of interproximal bone loss exceeding ≥ 50% of the root length, (3) PD ≥ 5 mm at at more than eight sites per quadrant, (4) ≥30 years old or <40 years old with a rapid bone loss as shown by radiographs, (5) a minimum of six teeth per quadrant, (6) a concentration of more than 104 colony-forming units/mL of …				Test group (II): SRP + Er:YAG laser (Er group). Test group (III): SRP + Nd:YAG + Er,YAG lasers. (NdErNd group)			Control group: SRP			Compared to baseline, both treatments demonstrated an improvement in periodontal parameters at 1 year. However, SRP+diode laser produced a significant improvement in probing depth (PD; 2.56 – 0.44 vs. 3.36 – 0.51 mm, p < 0.05) and CAL (3.47 – 0.25 vs. 4.11 – 0.26 mm, p < 0.05) values compared to SRP alone. Similarly, in the SRP+diode laser group, the bacteria of orange complex group were signific…			CAL (primary outcome variable), PPD, BOP, FMPS				Microbiologicalanalysis				1 year
Efficacy of Adjunctive Er, Cr:YSGG Laser Application Following Scaling and Root Planingin Periodontally Diseased Patients.				Magaz VR, AlemanyAS, Alfaro FH, Molina JN.			2016		RCT in split-mouth		Pubmed				30 patients with moderate chronic periodontitis with (1) at least two teeth with at least one site with PPD between 4 to 9 mm in each quadrant with BOP, (2) at least one incisor, one premolar, and one molar in each quadrant, (3) no systemic disease, (4) no periodontal treatment or antibiotic therapy in the last 6 months, (5) no pregnancy, (6) aged ≥18 .				Test group: LLT + SRP			Control group: SRP			Both therapies resulted in improved probing pocket depths and clinical attachment levels			PPD, CAL (primary outcomes variables) PI, BOP GR				None				6 months
Antimicrobial photodynamic therapy as an adjunct to non-surgical treatment of aggressive periodontitis: a split-mouth randomized controlled trial.				Moreira AL, NovaesAB Jr, Grisi MF, TabaM Jr, Souza SL, Palioto DB, de Oliveira PG, Casati MZ, Casarin RC, Messora MR.			2014		RCT double-masked in split-mouth (the allocation sequence was performed using a permuted block design with a computer random number generator (allocation ratio of 1:1); the allocation sequence was concealed in opaque sealed envelopes)		Pubmed				20 patients with generalized AgPwith (1) good general health, (2) generalized interproximal attachment loss involving at least 3 teeth other than first molars and incisors, (3) microbial deposits inconsistent with the severity of periodontal destruction, (4) familiar aggregation, (5) ≤ 35 years of age, (6) minimum of 20 teeth, (7) two pairs of single rooted contralateral teeth with proximal sites…				Test group: SRP + diode laser			Control group: SRP			In deep periodontal pockets analysis (Probing pocket depth – PD ≥ 7mm at baseline), Test Group presented a decrease in PD and a clinical attachment gain significantly higher than Control Group at 90 days (P < 0.05). Test Group also demonstrated significantly less periodontal pathogens of red and orange complexes and a lower ratio IL-1β/IL-10 than Control Group (P < 0.05)			CAL (primary outcome variable), PPD, PI, BOP, GR				GCF and microbiologicalanalysis				3 months
Lack of adjunctive benefit of Er:YAGlaser in non-surgical periodontal treatment: a randomized split-mouth clinical trial				Rotundo R, Nieri M, Cairo F, Franceschi D, Mervelt J, Bonaccini D, Esposito M, Pini-Prato G.			2010		RCT in split-mouth (the central registrar generated the allocation sequence by means of a computer- generated random permuted block; the allocation concealment was performed by opaque sealed envelopes, sequentially numbered)		Pubmed				26 patients, (1) ≥18 years, (2) no systemic disease, (3) no pregnancy, (4) no periodontal treatment and systemic antibiotic therapy in the last 6 months, (5) presence of at least one incisor, one premolar and one molar in each quadrant, (6) presence of at least two teeth with at least one site with PD that ranged between 4 and 9 mm in each quadrant with BOP.				Test group: SRP + Er,Cr:YSGG laser			Control group 1: supra gingival professional prophylaxis (s)			Six months after therapy, Er:YAGlaser showed no statistical difference in clinical attachment gain with respect to supragingival scaling [0.15 mm (95% CI 0.16; 0.46)], while SRP showed a greater attachment gain than the supragingival scaling [0.37 mm (95% CI 0.05; 0.68)]. No difference resulted between Er:YAGlaser SRP and SRP alone [0.05 mm (95% CI 􏰀 0.25; 0.36)].			CAL, PPD (primary outcome variables), BOP, PI, FMPS, FMBS				Patient evaluation of the operative procedure (VAS)				6 months
																			Test group: SRP + aPDT
																			Test group 2: Er:YAGlaser + SRP (L + SRP). Test group 3: Er:YAGlaser (L). Group 4: SRP (srp)
Microbiological effects and recolonization patterns after adjunctive subgingival debridement with Er:YAG laser				Sanz-SánchezI, Ortiz-VigónA, Herrera D, Sanz M			2015		RCT single-masked in parallel (treatment was assigned by means of a computer-generated random list; the allocation concealment was performed through the use of opaque sealed envelopes)		Pubmed				40 patients with initial and/or moderate chronic periodontitis with (1) age 25–80 years, (2) a minimum of 4 teeth per quadrant, (3) at least 4 teeth per quadrant with PD ≥ 4,5 mm and radiographic bone loss between 30 and 50% in more than 30%of the teeth, (4) good general health, (5) no subgingival instrumentation within 12 months prior, (6) use of systemic antibiotics within 3 months prior, (7) n…							Control group: full-mouth sub gingival debridement			Minor changes were observed for total colony- forming units, with no differences between groups. For the frequency of detection, a limited and similar impact in both groups was observed for the most prevalent (over 80 %) periodontal pathogens (Porphyromonasgingivalis, Prevotellaintermedia, Fusobacterium nucleatum). For proportions, reductions in P. gingivalis occurred at 3 months, both in the tes…			PPD (primary outcome variable), REC, BOP, Plaque absence/presence				Microbiologicalanalysis				1 year
The Effect of Low-Level Laser Therapy as an Adjunct to Non-Surgical Periodontal Treatment				Aykol G, Baser U, Maden I, Kazak Z, Onan U, Tanrikulu-Kucuk S, AdemogluE, Issever H, Yalcin F.			2011		RCT (treatment was assigned by flipping a coin)		Pubmed				36 patients systematically healthy with moderate to advance chronic periodontitis, (1) no periodontal treatment or used antibiotics during the last 6 months, (2) no acute oral infection, (3) minimum 16 teeth.							Control group: full-mouth			The primary outcome variable in this study was change in gingival bleeding and inflammation. At all time points, the LLLT group showed significantly more improvement in sulcus bleeding index (SBI), clinical attachment level, and probing depth (PD) levels compared to the control group (P <0.001). There were clinically significant improvements in the laser-applied smokers’ PD and SBI levels compare…			PI, SBI, PPD, CAL,				GCF				6 months
The Effect of Low‐Level Laser Therapy on Nonsurgical Periodontal Therapy: A Clinico‐biochemical Study				Mishra A, Shergill N.			2018		RCT single-blinded in split-mouth (treatment was assigned by flipping a coin)		Google Scholar				20 patients with chronic generalized periodontitis. (1) systematically health, (2) at least two bilateral maxillary premolars with PPD ≥5 mm, (3) no pregnant or lacting, (4) no use of antibiotics, anti‐inflammatory drugs, hormones, or immunosuppressive agents during 6 months before, (5) no dental treatment during the last 1 year before.				Test group: full-mouth sub gingival debridement + Er:YAGlaser			Control group: SRP			Intra group comparison for both the groups showed significant difference from baseline to one month for MGI and SBI and PD showed significant difference only in the test group , whereas from baseline to three months all the parameters showed statistically significant difference. Intergroup comparison between the groups showed statistically significant differences between MGI, SBI and CRP levels.			PPD, CAL, MGI, SBI				GCF				3 months
																			Test group: full-mouth + LLT
																			Test group: SRP + LLT

## Sheet: Table S2
Table 2. Non surgical periodontal therapy and ozone
Title	Authors				Year				Evidence				Source			P (problem)			I (intervention)			C (control)					O (outcome)	Clinicalparameters				Other parameters				Follow-up
The effects of ozone therapy on periodontal therapy: A randomized placebo-controlled clinical trial.	Tasdemir Z, Oskaybas MN, Alkan AB, CakmakO.				2019				RCT placebo‐controlled, double‐blind in split‐mouth (randomization was done by tossing a coin)				Pubmed			36 patients with moderate and/ or severe generalized periodontitis, (1) systematically healthy, (2) more 20 teeth (excluding third molars), (3) no periodontal treatment within 6 months, (4) no antibiotic use within the previous 3 months, (5) no pregnancy and lactation, (6) no past or current smoking and alcohol consumption, (7) no contraindications for OT			Test group: SRP + topical gaseous ozone			Control group: SRP + placebo					PI, GI, PD, percentage of bleeding on probing, percentage of pockets deeper than 5 mm and CAL, and percentage of ≥3 mm CAL were improved, and there were no significant differences between the two sides. All inflammatory parameters, PTX‐3, Hs‐CRP, and IL‐1, were reduced at 3‐month follow‐up. Only the decrease in PTX‐3 levels be‐ tween baseline and 3‐month follow‐up was statistically significant.	PI, GI, PD, BOP, % of BOP (+) sites, CAL; in addition % of pockets deeper than 5 mm, ≥3 mm CAL sites and missing teeth				GCF				3 months
Evaluating clinical and laboratory effects of ozone in non-surgical periodontal treatment: a randomized controlled trial.	Seydanur DengizekE, Serkan D, Abubekir E, AysunBay K, Onder O, Arife C.				2018				RCT in parallel, double-blinded(treatment was assigned using a randomization list)				Pubmed			37 patients with moderate generalized chronic periodontitis with (1) 3 or more teeth having PD between 4 and 6 mm, in at least two quadrants, with radiographic signs of bone loss, (2) a minimum of 20 teeth , (3) no periodontal therapy within the last 12 months, (4) no systemic disease which could affect periodontal treatment outcomes, (5) no systemic antibiotics within the last 6 months, (6) no p…			Test group: full-mouth + topical gaseous ozone			Control group: FM + placebo					Changes following treatment in PI, GI, probing depth, and CAL scores were similar for both groups (p>0.05). Of note, TGF-βlevels were observed to be higher in the treatment group than in controls (p<0.05). Changes in 8-OHdG, TAS, TOS, NO, MPO, GSH and MDA levels, however, were not significantly different between groups (p>0.05).	PI, GI, PD, CAL				Total antioxidant status (TAS), total oxidant status (TOS), nitric oxide (NO), 8-hydroxy-2'-deoxyguanosine (8-OHdG), myeloperoxidase (MPO), glutathione (GSH), malondialdehyde (MDA), and transforming growth factor- beta (TGF-β) levels were evaluated from saliva samples.				1 months
Clinical and microbiological effects of ozone nano-bubble water irrigation as an adjunct to mechanical subgingival debridement in periodontitis patients in a randomized controlled trial	Hayakumo S, Arakawa S, Mano Y, Izumi Y.				2012				RCT placebo-controlled, with blind allocation to two parallel groups (the random sequence was computer-generated, with no stratification of balancing factors; the subjects chose a sequentially numbered opaque, sealed envelope, which enclosed the code for the treatment protocol they were to receive)				Pubmed			21 healthy patients, non-smoking, that exhibited mild to moderate chronic periodontitis with (1) a minimum of 20 teeth present and exhibited at least one pocket site with a probing depth of 4 mm or more in each quadrant, (2) no periodontal treatment and/or antibiotic therapy within the preceding 6 months, (3) no pregnant or lacting.			Test group: full-mouth + NBW3			Control group: FM + water					There were significant improvements in all clinical parameters after 4 weeks in both groups. The reduction in the probing pocket depth and the clinical attachment gain after 4 and 8 weeks in the NBW3 group were significantly greater than those in the WATER group. Moreover, only the NBW3 group showed statistically significant reductions in the mean total number of bacteria in subgingival plaque ov…	PPD, CAL (primary outcome variables), BOP				Microbiologicalanalysis				8 weeks
Ozone application as adjunctive therapy in chronic periodontitis: Clinical, microbiological and biochemical aspects	Uraz A, KaradumanB, Isler SÇ, GönenS, Çetiner D.				2018				RCT in split-mouth (randomization was done by tossing a coin)				Pubmed			18 patients with generalized chronic periodontitis with (1) good general health (patients without systemic involvement and those not taking any medication), (2) no periodontal treatment within 6 months, (3) no antibiotics or anti-inflammatory medication taken within 6 months, (4) no smoking, (5) no pregnant or lactating, (6) no contraindication for periodontal treatment and ozone application, (7)…			Test group: SRP + topical gaseous ozone			Control group: SRP					Statistically significant improvements in all clinical parameters were accompanied by a reduction in microbiological and biochemical parameters in both treatment groups. SRP treatment resulted in a significant reduction of Porphyromonasgingivalis (Pg) at 1st month and Tannerellaforsythia (Tf ) and Prevotellaintermedia (Pi) at 3 months. Following SRP treatment the interleukin (IL)-8 levels were si…	PPD, PI, GI, BOP (primary outcome variables; the differences were secondary outcomes)				GCF and analysis of subgingival plaque (bacterial species, and cytokines were primary outcome variables; the differences of counts and pro- portions of the bacterial species analyzed and values of cytokines were secondary outcome variables)				3 months
Evaluation of the influence of ozonotherapy on the clinical parameters and MMP levels in patients with chronic and aggressive periodontitis.	Skurska A, Pietruska MD, Paniczko-Drężek A, Dolińska E, Zelazowska-Rutkowska B, Zak J, Pietruski J, Milewski R, Wysocka J.				2010				RCT				Pubmed			49 patients generally healthy subjects with chronic or aggressive periodontitis, aged 25-68 years. 14 patients without periodontal lesions were assigned to a control group (no analyzed)			Group CP-S consisted of 12 patients with chronic periodontitis: SRP. Group CP-O included 25 patients with chronic periodontitis: SRP + topical gaseous ozone. Group AP, there were 15 patients with aggressive periodontitis: SRP + topical gaseous ozone			Control group (C) contained 14 generally healthy subjects					All the clinical parameters assessed in the study groups were reduced after treatment. SRP with additional ozonotherapyprovided an increase in MMP levels in patients with chronic periodontitis and a reduction in MMP levels in patients with aggressive periodontitis.	PI, API, BOP SBI, PPD, CAL				Levels MMP-1, MMP-8 and MMP-9				2 months

## Sheet: Table S3
Table 3. Non surgical periodontal therapy and air-polishing
Title	Authors					Year	Year		Evidence					Source	P (problem)			I (intervention)					C (control)				O (outcome)	Clinicalparameters				Other parameters				Follow-up
Clinical and microbiological effects of the supplementary use of an erythritol powder air-polishing device in non-surgical periodontal therapy: a randomized clinical trial.	Park EJ, Kwon EY, Kim HJ, Lee JY, Choi J, Joo JY.					2018			RCT (randomization was done with a randomized envelope specifying whether it was assigned to the test or control group)					Pubmed	21 patients with moderate chronic periodontitis with (1) age from 19 to 70 years old, (2) at least 1 tooth with a PPD of 4–6 mm in any of the teeth from the incisor to the second molar on either side of the oral cavity, (3) no systemic disease, (4) no pregnant or breastfeeding, (5) no periodontal treatment or antibiotic treatment within 6 months prior.			Test group: SRP + EPAP					Control group: SRP				There were no significant clinical differences between the test group and the control group. Microbiological analysis revealed that the relative expression level of Porphyromonasgingivalis was significantly lower in the test group than in the control group at 1 month after treatment. Clinical and microbiological results showed improvements at 1 month compared to baseline; in contrast, the results…	PPD, REC, CAL, BOP, PI				Microbiologicalanalysis				3 months
Efficacy of glycine powder air-polishing combined with scaling and root planing in the treatment of periodontitis and halitosis: A randomised clinical study.	Caygur A, Albaba MR, Berberoglu A, Yilmaz HG.						2017		RCT single-blinded (computer-randomized)					Pubmed	60 patients with (1) at least three teeth with 4- to 6-mm periodontal pockets, (2) acute infectious oral lesions, (3) no furcation defects, (4) no use of antibiotics for any reason within the last 4 weeks, (5) no periodontal treatment within the last 6 months, (6) no pregnancy or lactation.			Test group: SRP + GPAP					Control group: SRP				Both groups showed significantly lower plaque index, gingival index, pocket depth, bleeding on probing, and clinical attachment level gain scores at 1 month than at baseline. No significant differences were found between the groups at any time point. The VSCs were significantly different at 1 month compared with baseline in both groups. However, the intergroup comparisons of VSCs were not statist…	PI, GI, PPD, BOP, CAL				Halitosis				1 months
Subgingival glycine powder air‐polishing as an additional approach to nonsurgical periodontal therapy in subjects with untreated chronic periodontitis	Tsang YC, Corbet EF, Jin LJ.						2018		RCT single-blinded in split-mouth (randomization was done by tossing a coin)					Pubmed			27 systematically health non-smoking patients with chronic periodontitis with (1) 18- 65 years of age, (2) at least 20 teeth present excluding third molars; (3) at least 2 teeth, with PD ≥5 mm and CAL ≥5 mm, in 2 quadrants, (4) radiographic signs of alveolar bone loss, (5) no systemic conditions in need of antibiotic prophylaxis, (6) no pregnancy, (7) current immunosuppressive therapy, (8) no cur…	Test group: SRP + GPAP					Control group: SRP + water				At baseline, no statistically significant difference in periodontal and gingival crevicular fluid parameters was found between the Test and Control groups. Overall, the periodontal conditions of all subjects showed significant improvement after the treatments. Notably, the Test group showed greater reduction in gingival crevicular fluid volume (0.37 ± 0.26 μL) than the Control group (0.23 ± 0.30 …	BOP, PD, CAL, GR				GCF				6 months

## Sheet: Table S4
Table 4. Non surgical periodontal therapy and probiotics
Title		Authors					Year		Evidence	Source							P (problem)				I (intervention			C (control)		O (outcome			Clinicalparameters				Other parameters					Follow-up
A double-blind, paralleled-arm, placebo-controlled and randomized clinical trial of the effectiveness of probiotics as an adjunct in periodontal care.		Pelekos G, Ho SN, Acharya A, Leung WK1, McGrath C.					2019		RCT parallel, placebo, double-blinded (block randomization with a selected block size of four (‘ABBA’) was used to allocate the subjects into the test or control group; allocation concealed in sequentially numbered opaque sealed envelopes)	Pubmed							41 patients with chronic periodontitis with (1) aged 18 or older, (2) no tobacco users/ non-users of electronic nicotine delivery devices, (3) in good general health, (4) minimum of 10 teeth (excluding third molars) , (5) at least 2 non-adjacent teeth with PPD ≥ 5mm and evidence of radiographic bone loss, (6) no pregnancy or lactation, (7) no periodontal treatment in the 6-month period before, (8…				Test group: full-mouth + probiotic lozenges			Control group: full-mouth + placebo lozenges		The trial response rate was 69.5% (41 out of 59). Among the test and control groups, there were significant intra-group differences in primary outcomes: CAL (both, p<0.001) and PPD (both, p<0.001); and in secondary outcomes: percentage of sites with ‘bleeding on probing’ (both, p<0.001) and visible plaque (both, p<0.001). No statistically significant inter-group differences in any outcomes at any…			CAL, PPD (primary outcome variables), BOP, VP				None					6 months
Effects of Bifidobacterium probiotic on the treatment of chronic periodontitis: A randomized clinical trial.		Invernici MM, Salvador SL, Silva PHF, Soares MSM, Casarin R, Palioto DB, Souza SLS, Taba M Jr, Novaes AB Jr, Furlaneto FAC, Messora MR.					2018		RCT placebo-controlled (according to a random numeric table generated by computer soft- ware, the study coordinator allocated each patient to one of the group; the selected individuals were identified by a numeric code)	Pubmed							41 patients with generalized chronic periodontitis with (1) good general health, (2) age over 30 years, (3) 30% or more of the sites with PPD ≥ 4 mm and CAL ≥ 4 mm, (4) presence of BOP, (5) a minimum of five teeth with at least one site with CAL and PPD ≥ 5 mm, (6) cause-related periodontal therapy or antimicrobial therapy in the previous 6 months, (7) no systemic conditions that could influence …				Test group: SRP + probiotics			Control group: SRP + placebo		The Test group presented a decrease in probing pocket depth and a clinical attachment gain significantly higher than those of the Control group at 90 days. The Test group also demonstrated significantly fewer periodontal pathogens of red and orange complexes, as well as lower proinflammatory cytokine levels when compared to the Control group. Only the Test group showed an increase in the number o…			CAL (primary outcome variable), PPD, GR, PI, BOP				Microbiological and immunological analysis					90 days
Microbiological and clinical effects of probiotics and antibiotics on nonsurgical treatment of chronic periodontitis: a randomized placebo- controlled trial with 9-month follow-up.		Morales A, Gandolfo A, Bravo J, CarvajalP, Silva N, GodoyC, Garcia-SesnichJ, Hoare A, Diaz P, Gamonal J.					2018		RCT parallel, placebo-controlled, double-blinded (treatment was assigned a computer-generated randomization table; allocation concealment was prepared using sequentially numbered, opaque sealed envelopes)	Pubmed							47 healthy patients untreated for periodontitis with chronic periodontitis with (1) at least five teeth with periodontal sites with PPD ≥ 4mm and CAL ≥1 mm, 20% BOP and extensive radiographically determined bone loss, (2) presence of a minimum of 14 natural teeth, excluding third molars, (3) presence of at least 10 posterior teeth, (4) no pregnant and breastfeeding, (5) no periodontal treatment b…				Test group: SRP + probiotics. Test group: SRP + antibiotic			Control group: SRP + placebo		All groups showed improvements in clinical and microbiological parameters at all time points evaluated. Probiotic and antibiotic groups showed greater reductions in cultivable microbiota compared with baseline. The placebo group showed greater reduction in number of subjects with P. gingivalis compared with baseline. However, there were no significantdifferences betweengroups.			CAL (primary outcome variable) , PPD, BOP, plaque accumulation				Microbiologicalanalysis					9 months
Lactobacillus salivariusNK02: a Potent Probiotic for Clinical Application in Mouthwash.		Sajedinejad N, Paknejad M, Houshmand B, Sharafi H, JelodarR, Shahbani Zahiri H, Noghabi KA.					2018		RCT placebo, double-blinded (randomization was done using a computer- generated list)	Pubmed							90 patients: 50 patients with moderate to severe chronic periodontitis and 40 healthy patients. (1) presence of bone loss due to periodontal infection, (2) presence of periodontal pockets more than 5 mm, (3) having complete health situation, (4) no patients suffering from systemic diseases, (5) no administration of immunosuppressive medicines by the patients, (6) no usage of antibiotics by the pa…				Test group: SRP + probiotic mouthwash			Control group: SRP + placebo		The results showed that SRP+ probiotic treatment led to a significant decrease of gingival index (GI) and bleeding on probing (BOP) compared with that of SRP + placebo for the probiotic group. The rate of decrease in pocket depth was displayed in the group with SRP + probiotic treatment equal to 1/2 mm, and probing pocket depth (PPD) value was decreased in the probiotic bacteria treatment group t…			PI, FMPS, GI, BOP, PPD				Microbiologicalanalysis					4 weeks
Clinical Effects of Lactobacillus rhamnosusin Non-Surgical Treatment of Chronic Periodontitis: A Randomized Placebo-Controlled Trial With 1-Year Follow-Up.		Morales A, Carvajal P, Silva N, Hernandez M, Godoy C, Rodriguez G, Cabello R, Garcia-Sesnich J, HoareA, Diaz PI, Gamonal J.					2016		RCT parallel, placebo-controlled, double-blinded (randomization was computer-generated, with allocation concealment by opaque sequentially numbered sealed envelopes)	Pubmed							28 systematically healthy patients with chronic periodontitis with (1) at least 35 years of age, (2) presence of a minimum of 14 natural teeth, excluding third molars, (3) presence of at least 10 posterior teeth, previously untreated periodontitis, (4) periodontal treatment before, (5) no antibiotics or non-steroid anti-inflammatory therapy in the 6-month period prior, (6) no pregnancy and nursin…				Test group: SRP + probiotics (sachets)			Control group: SRP + placebo (sachets)		Both test and control groups showed improvements in clinical parameters at all time points evaluated. The test group, however, showed greater reductions in PPD than the control. Also, at initial visits and after 1-year follow-up, the test group showed a statistically significant reduction in number of participants with PPD ≥ 6mm, indicating a reduced need for surgery, in contrast to the placebo g…			CAL (primary outcome variable), PPD, BOP,PI (secondary outcome variables were changes in PPD, PI and BOP, percentages of sites with PPD ≥ 5mm, ≥ 6mm, ≥ 7mm, percentages of teeth with PPD ≥ 5mm, ≥ 6mm, ≥ 7mm and number of individuals with PPD ≥ 5mm, ≥ 6mm, ≥ 7mm.)				None					1 year
Clinical and Biochemical Evaluation of Lozenges Containing Lactobacillus reuteri as an Adjunct to Non-Surgical Periodontal Therapy in Chronic Periodontitis.		İnce G, Gürsoy H, İpçi ŞD, Cakar G, Emekli-AlturfanE, Yılmaz S.					2015		RCT parallel, placebo, double-blinded (treatment was assigned using a computer-based randomization program)	Pubmed							30 patients with chronic periodontitis with (1) radiographically detected horizontal bone loss, (2) at least 2 teeth with an approximal site each with a PD of 5-7 mm, (3) GI of ≥2 in each quadrant, (4) no periodontal or antimicrobial treatment within the prior 6 months, (5) systemic disease, (6) no history of smoking, (7) no pregnancy, (8) no use of probiotic supplements, (9) history of adverse r…				Test group: SRP + probiotic lozenges			Control group: SRP + placebo lozenges		Intergroup comparisons of PI, GI, BoP, and PD was found to be significant (p<0.05) in favor of the test group at all time points. Decreased GCF MMP-8 levels and increased TIMP-1 levels were found to be significant up to day 180 (p<0.05). Mean values of attachment gain were significantly higher in test group compared with control group on days 90, 180 and 360.			PPD (primaryoutcomevariable), CAL, PI, GI, BOP				GCF, MMP-8 levels and iTIMP-1 levels					1 year
Clinical and microbiological effects of probiotic lozenges in the treatment of chronic periodontitis: a 1-year follow-up study.		Tekce M, Ince G, Gursoy H, DirikanIpci S, Cakar G, Kadir T, Yılmaz S.					2015		RCT parallel, placebo, double-blinded (treatment was assigned using a computer-based randomization program)	Pubmed							40 patients with chronic periodontitis with (1) radiographically detected horizontal bone loss, (2) at least 2 teeth with an approximal site each with a PD of 5-7 mm, (3) GI of ≥2 in each quadrant, (4) no periodontal or antimicrobial treatment within the prior 6 months, (5) systemic disease, (6) no history of smoking, (7) no pregnancy, (8) no use of probiotic supplements, (9) history of adverse r…				Test group: SRP + probiotic lozenges			Control group: SRP + placebo lozenges		After treatment, the measured PI, GI, BoPand PD were significantly (p < 0.05) lower in Group I compared with Group II at all time points. Similar observations were made for the total viable cell counts and the proportions of obligate anaerobes with the exception of day 360. In Group I, significantly fewer patients required surgery on ≥3 sites.			PPD (primaryoutcomevariable), PI, GI, BOP				Microbiologicalanalysis					1 year
Clinical and microbiological effects of Lactobacillus reuteriprobiotics in the treatment of chronic periodontitis: a randomized placebo-controlled study.		Teughels W, Durukan A, Ozcelik O, Pauwels M, Quirynen M, Haytac MC.					2013		RCT parallel, placebo, double-blinded (treatment was assigned using a block randomization)	Pubmed							30 healthy patients with chronic periodontitis with (1) at least 35 years of age, (3) a minimum of three natural teeth in each quadrant, excluding third molars, (4) previously untreated moderate to severe generalized adult periodontitis, (5) no antibiotics for any purpose within 6 months or the need for antibiotic coverage, (6) no pregnancy and nursing, (7) no acute oral lesions or necrotizing ul…				Test group: OSFMD + probiotic lozenges			Control group: OSFMD + placebo lozenges		At week 12, all clinical parameters were significantly reduced in both groups, while there was significantly more pocket depth reduction (p < 0.05) and attachment gain (p < 0.05) in moderate and deep pockets; more Porphyromonasgingivalis reduction was observed in the SRP + probiotic group.			PPD (primary outcome variable), CAL, REC, BOP, GI, PI				Microbiologicalanalysis					12 weeks
Clinical changes in periodontal subjects with the probiotic Lactobacillus reuteri Prodentis: a preliminary randomized clinical trial.		Vicario M, Santos A, Violant D, NartJ, Giner L.					2013		RCT parallel, placebo, double-blinded (randomization was done using a computer-generated table)	Pubmed							20 patients non-smokers with chronic periodontitis aged 18 years or more with (1) good general health, (2) no pregnant or lactating, (3) no antibiotic pre-medication for the performance of periodontal examination, (4) no antibiotic or antiseptic treatments in the previous 3 months				Test group: SRP + probiotic lozenges			Control group: SRP + placebo lozenges		Periodontal clinical parameters were improved in the test group after a 30-day intervention. The test group demonstrated a statistically significant reduction (p < 0.05) in all the periodontal parameters included in the study (plaque index, bleeding on probing and pocket probing depths), while the control group treated with placebo did not show any statistically significant change in periodontal …			PPD, BOP, PI				None					1 month
Comparison of efficacy of probiotics versus tetracycline fibers as adjuvants to scaling and root planing		Boyeena L, Koduganti RR, Panthula VR, Jammula SP.					2019		RCT parallel	Pubmed							30 patients with chronic periodontitis with (1) at least 20 teeth, with periodontal pockets which bled on probing with probing depths ≥5 mm, (2) no smokers, (3) no systemically compromised individuals, (4) no medications, such as corticosteroids or calcium channel blockers, which are known to interfere with periodontal wound healing, (5) no allergy medications, (6) no pregnant or lactating, (7) n…				Test group A: full-mouth + probiotics subgingivally. Test group C: full-mouth + probiotics and tetraciclinefibers subgingivally			Control group B: full-mouth + tetraciclinefibers		Intragroup comparison yielded significant improvement in all the variables (P < 0.0001). However, intergroup comparison showed statistically significant differences pertaining to the PD (P < 0.001) and SBI only (P < 0.001), between Group A and Group B and Group B and Group C respectively.			PI, PPD, SBI ( primary outcomes variables)				Microbiologicalanalysis					45 days
Effect of local probiotic (Lactobacillus reuteri) vs systemic antibiotic therapy as an adjunct to non-surgical periodontal treatment in chronic periodontitis		Ikram S, Hassan N, Baig S, Borges KJJ, Raffat MA, Akram Z.					2018		RCT double-blinded (concealed allocation was performed using opaque, sealed envelopes)	Pubmed							30 patients systematically healthy with chronic periodontitis with (1) ≥30 years, (2) PPD of ≥4 mm, (3) no pregnant and lactating, (4) no medical conditions requiring prophylactic antibiotic cover before dental treatment, (5) no periodontal treatment given in the past 6 months, (6) no mentally handicapped patients who could not adhere to oral hygiene procedure.				Test group: SRP + probiotics			Control group: SRP + antibiotics		Intragroup analysis showed statistically-significant improvement in all clinical parameters: plaque index, bleeding on probing, periodontal pocket depth, and clinical attachment level gain at each follow-up visit. However, intergroup comparison of clinical periodontal parameters did not show statistical significance.			PI, BOP, PPD, CAL				None					3 months
Effect of the probiotic Lactobacilli reuteri(Prodentis) in the management of periodontal disease: a preliminary randomized clinical trial		Vivekananda MR, Vandana KL, BhatKG.					2010		RCT placebo-controlled, double-blinded in split-mouth (treatment was assigned using a randomization table)	Pubmed							30 patients with chronic periodontitis with (1) mild to moderate periodontal pockets (5􏰆7 mm) clinically and radiographic evidence of bone loss were included, (2) general good health, (3) no antibiotic treatment, (4) no surgical or non-surgical therapy within 6 months prior, (5) no smokers, (6) no pregnant or lacting, (7) no alcoholic				Test group: SRP (split-mouth) + probiotic lozenges			Control group: no treatment, but probiotics lozenges		At day 42, the PI, GI, and GBI were significantly reduced by all treatment modalities. When ranked, the amount of PI, GI and GBI reduction by the different treatments was SRP􏰅Prodentis􏰉Prodentis􏰉SRP􏰅placebo􏰉placebo; all differences were statistically significant. For PPD and CAL, the best result was obtained with the SRP􏰅Prodentistreatment. PPD was reduced from 5.0890.75 to 3.7890.61 mm (pB0.001)…			PI, GI, GBI, PPD, CAL				Microbiologicalanalysis					42 days
Efficacy of local use of probiotics as an adjunct to scaling and root planing in chronic periodontitis and halitosis: A randomized controlled trial.		Penala S, Kalakonda B, Pathakota KR, Jayakumar A, Koppolu P, Lakshmi BV, Pandey R, Mishra A.					2016		RCT parallel, placebo-controlled, double-blinded (randomization was done using a computer generated random numbers)	Pubmed							29 patients systematically healthy with chronic periodontitis with (1) 25-59 years, (2) at least 4 teeth showing PD ≥5 mm, CAL ≥4 mm, (3) clinically perceptible halitosis, (4) no probiotic supplements or antibiotic therapy for the past 3 months, (5) no periodontal treatment for the past 6 months, (6) no pregnant or lactating, (7) no history of smoking or any other habits, (8) no allergy to lactat…				Test group: full-mouth + probiotic mouthwash and subgingival delivery of probiotic solution			Control group: full-mouth + placebo		All the clinical and microbiological parameters were significantly reduced in both groups at the end of the study. Inter-group comparison of PD reduction (PDR) and clinical attachment gain (CAG) revealed no statistical significance except for PDR in moderate pockets for the test group. Test group has shown statistically significant improvement in PI, MGI, and BI at 3 months compared to control gr…			PPD, CAL (primary outcome variables), MGI, BI, PI				ORG of halitosis and BANA test (primary outcome variables)					3 months
Evaluation of the effect of probiotic (inersan®) alone, combination of probiotic with doxycycline and doxycycline alone on aggressive periodontitis - a clinical and microbiological study.		Shah MP, GujjariSK, Chandrasekhar VS.					2013		RCT pilot (randomization was done using a block randomization)	Pubmed							30 patients with aggressive periodontitis with (1) a probing depth and a loss of the clinical attachment level which were ≥ 5 mm, and with a radiographic evidence of bone loss, (2) no systematic diseases, (3) no antibiotics or anti-inflammatory drugs during the six months prior, (4) no dental caries, (5) no psychiatric disorders, (6) no lactose intolerance and allergy to doxycycline or probiotics…				Test group A: SRP + probiotics. Test group B: SRP + probiotics and doxycycline.			Control group C: SRP + doxycycline		The administration of the probiotic alone, a combination of the probiotic with doxycycline and doxycycline alone, resulted in a decrease in the plaque index, the gingival index, the probing pocket depth and the clinical attachment level at 2 months, which was statistically significant (p < 0.05). The A. actinomycetemcomitanscount tended to decrease in all the three groups at 2 months, which was s…			PI, GI, PPD, CAL				Microbiological analysis (presence of Lactobacilli and A. actinomycetemcomitans)					2 months
Effectiveness of scaling and root planing with and without adjunct probiotic therapy in the treatment of chronic periodontitis among shamma users and non-users: A randomized controlled trial.		Vohra F, Bukhari IA, Sheikh SA, Albaijan R, Naseem M, Hussain M.					2020		RCT parallel (randomization was done picking a paper from an opaque bag)	Pubmed							127 patients with chronic periodontitis (1) shamma-users (individuals who reported to have been consuming shamma at least once daily since at least 12 months), (2) self-reported controls, (3) no self-reported tobacco-smoking, (4) no immunocompromised health status, (5) no use of antibiotics, bisphosphonates, steroids and/or non-steroidal anti- inflammatory drugs within the past 3-months, (6) no p…				Test group 1: shamma-chewers SRP + probiotic lozenges. Test group 3: no chewers SRP + probiotic lozenges			Control group 2: shamma-chewers SRP. Control group 4: no chewers SRP		In total, 31, 32, 31 and 33 individuals were included in groups 1, 2, 3 and 4, respectively. Among shamma-users, there was no significant difference in the scores of PI, BOP, PD, clinical AL and MBL when SRP was performed with/without adjunct PT. Amongst control-individuals, SRP with adjunct PT was more effective in reducing PI (P<0.05), BOP (P<0.05) and PD (P<0.05) at 3-months follow-up. There w…			CAL, PPD (primary outcome variables), PI, MBL, BOP				None					6 months

## Sheet: Table S5
Table 5. Non surgical periodontal therapy and chlorexidine
Title			Authors					Year	Evidence			Source					P (problem)			I (intervention)		C (control)				O (outcome)					Clinicalparameters			Other parameters			Follow-up
Different methods for subgingival application of chlorhexidine in the treatment of patients with chronic periodontitis			Lecic J, CakicS, JanjicPavlovic O, Cicmil A, Vukotic O, Petrovic V, Cicmil S.					2016	RCT in split-mouth (randomization was ensured by pulling one of three offered pieces of paper out from the opaque envelope; egionswere assigned to experimental and control by coin toss method)			Pubmed					15 patients with chronic periodontitis with (21–52 years of age, (2) with the presence of at least two bilateral periodontal sites probing ≥ 􏰀5mm, (3) no antibiotic treatment within the past 6 months, (4) periodontal treatment within the past 3 months, (5) no medically compromised, (6) no pregnant and lactating.			Test group (I): SRP + CHX solution. Test group (II) SRP + CHX gel. Test group(III): SRP + CHX chip		Control group (I-II-III) SRP				The most significant improvements were found concerning PI in CHX solution with SRP and CHX gel with SRP groups over controls at one month recall, as well as concerning BI and PPD in CHX chip with SRP group over SRP alone at three-month recall.					PI, PPD, BI, CAL			None			3 months
Efficacy of xanthan based chlorhexidine gel as an adjunct to scaling and root planing in treatment of the chronic periodontitis			Jain M, Dave D, Jain P, Manohar B, Yadav B, Shetty N.					2013	RCT			Pubmed					30 patients with localized or generalized chronic periodontitis with (1) good general health, (2) 30-60 years, (3) good general health, (4) presence of two periodontal sites located on the same side PD between 5 to 7 mm, (5) no systemic or subgingival antimicrobial within the 6 months prior, (6) no presence of bone vertical defects, (7) anti-inflammatory therapy within the 6 months prior, (8) no …			Test group: full-mouth + CHX gel		Control group: full-mouth				From baseline to a period of 6 months, significant difference was found between test and control group for PD, CAL, PI and BOP, P value being PD (P = 0.002), CAL index (P = 0.014), respectively.					PPD, CAL, PI, BOP, GI			None			6 months
Efficacy of Subgingival Application of Xanthan-based Chlorhexidine Gel Adjunctive to Full-mouth Root Planing Assessed by Real-time PCR: A Microbiologic and Clinical Study			Chitsazi MT, Kashefimehr A, Pourabbas R, ShirmohammadiA, GhasemiBarghi V, Daghigh Azar B.					2012	RCT (randomization envelope was opened and each tooth in one quadrant was randomized to one of the two treatments)			Pubmed					20 patients with generalized moderate and/or severe chronic periodontitis with (1) presence of at least one site per quadrant exhibiting pocket depth of ≥4 mm with BOP, (2) no active periodontal treatment during the previous 6 months, (3) no use of antibiotics for the previous 12 months, (4) no pregnant or lactating, (5) no systemic condition influencing the course of periodontal disease or treat…			Test group: SRP + Xan-CHX gel		Control group: SRP				Baseline PPDs were 4.90±0.78 and 5.05±0.79 in the SRP and gel groups, respectively (P>0.05), which decreased to 3.67±0.59 and 3.7±0.83 one month after treatment and 3.25±0.65 and 3.38±0.79 three months after treatment. Although values decreased significantly in both groups after one and three months (P=0.001 in the SRP and P=0.001 in the gel group), the inter-group difference was not significant …					PPD (primary outcome variable), CAL, REC, BOP, PI			Analysis of plaque			3 months
Comparative analysis of hyaluronan gel and xanthan-based chlorhexidine gel, as adjunct to scaling and root planing with scaling and root planing alone in the treatment of chronic periodontitis: A preliminary study.			Chauhan AS, Bains VK, Gupta V, Singh GP, Patil SS.					2013	RCT			Pubmed					60 patients with moderate and/or severe chronic periodontitis with (1) 30-65 years, (2) at least 20 teeth, (3) minimum of 8 teeth with PPD 4-8 mm, (4) no antibiotic and periodontal therapy for past 6 months, (5) no allergy to hyaluronic acid and CHX, (6) no pregnant and nursing, (7) no smokers, (8) no alcoholic.			Test group (II): SRP + HA (hyaluronan gel). Test group (III): SRP + CHX gel		Control group (I): SRP				In all the three groups, a significant reduction in PPD and gain in CAL were observed between baseline and 3 months follow-up (P< 0.05); however, at 3 months, change in PPD and CAL was more in Group II than Group III, but the difference was non-significant, and Group I (control) showed less changes in PPD and CAL than both experimental groups. Only one patient revealed positive value for CRP at b…					PPD, CAL, PI, GI			Systemic/hematologic parameters			3 months
Comparative evaluation of subgingivally delivered xanthan-based chlorhexidine gel and herbal extract gel in the treatment of chronic periodontitis.			Phogat M, Rana T, Prasad N, Baiju CS.					2014	RCT in split-mouth			Pubmed					30 patients with chronic periodontitis with (1) 30-50 years, (2) at least three nonadjacent interproximal sites with PPD 4-8 mm, (3) no periodontal and antibiotic therapy in the last 6 months, (4) no smokers, (5) tobacco and alcohol abusers, (6) no systemic illness, (7) no pregnant and lacting, (8) no antimicrobial mouthwash in the past 2 months, (9) no requiring periodontal surgery.			Test group B: SRP + CHX gel. Test group C: SRP + herbal gel. Test group D: CHX gel. Test group E: herbal gel.		Control group A: SRP				After 3 months, there were statistically significant reductions in all the clinical parameters for Groups B and C compared with Group A. There was no significant reduction in all clinical parameters between Group D and E where no mechanical therapy was performed.					PI, GI, PPD, CAL			None			3 months
Chlorhexidine-thymol varnish as an adjunct to scaling and root planing: A clinical observation.			Anand V, Govila V, Gulati M, Anand B, Jhingaran R, Rastogi P.					2012	RCT in split-mouth (lottery method was used to draw a random sample for the quadrants into three groups)			Pubmed					25 patients with generalized chronic periodontitis with (1) at least 20 teeth with minimum of four multi-rooted teeth and four teeth per quadrant, (2) at least four non adjacent sites with PPD 4-6 mm in each quadrant, (3) systemically healthy, (4) no pregnant or lactating, (5) no systemic antibiotics during the last 3 months, (6) no orthodontic treatment.			Test group B: SRP + chlorhexidine-thymol varnish. Test group C: chlorhexidine- thymol varnish		Control group A: SRP				Short term advantages were observed in the clinical parameters in subjects receiving scaling and root planingand an adjunct, chlorhexidineethymolvarnish who showed the greatest improvement in the periodontal parameters at 3 months.					PI, GI, PPD, CAL, BOP			None			3 months
Adjunctive effect of chlorhexidine antiseptics in mechanical periodontal treatment: first results of a preliminary case series.			Calderini A, Pantaleo G, Rossi A, Gazzolo D, Polizzi E.					2013	RCT double-blinded, in split-mouth (the two formulations were provided in identical packing so that neither the patient nor the investigator was aware of which treatment had been assigned)			Pubmed					10 systematically healthy patients with generalized chronic periodontitis, aged 38–45 years, with (1) two non-adjacent sites per quadrant with PD of 5mm or over and radiographic evidence of bone loss, (3) no history of systemic disease or antiseptic/antibiotic therapy within the last 3 months, (4) pregnancy or lactation, (5) no adverse effects to CHX, (6) cigarette smoking, (7) no physical or men…			Test group: full mouth + CHX digluconate 0.5% and CHX dihydrochloride 1%		Control group: full-mouth + CHX gluconate 1%				PPD significantly decreased over time both in the test and in the control group; however, no significant differences between the two groups were observed. BOP and TBC were significantly lower in the test than in the control group 6 weeks after treatment. In the post- treatment revaluation, a significant decrease both in the treatment and in the control group, for each of the single periodontal pa…					PPD, BOP			Microbiologicalanalysis			6 weeks
Chlorhexidine chip in the treatment of chronic periodontitis - a clinical study.			Medaiah S, Srinivas M, Melath A, Girish S, Polepalle T, Dasari AB.					2014	RCT (randomization was done by tossing a coin)			Pubmed					15 patients n the age group between 35-55 years with moderate and/or severe chronic periodontitis with (1) PPD 5-8 mm, (2) presence of minimum 15 natural teeth (minimum of at least 4 teeth per quadrant), (3) good state of health without any systemic disorder, (4) no history of allergy to CHX, (5) no systemic antibiotic therapy in the last six months, (6) no undergone surgery in relation to the si…			Test group B: SRP + CHX chip. Test group C: CHX chip		Control group A: SRP				All three groups presented with an improvement in the clinical parameters compared to baseline. There was no statistically significant difference between the SRP and SRP + CHIP group in all parameters. There was a significant difference when these two groups were compared to the chip alone group. The mean reductions in PPD were 2.8mm (SRP group), 2.6 (SRP+CHIP group), 0.8 (chip alone group) The m…					PPD, CAL, BOP, PI, GI			None			3 months
Comparison of an essential-oil-based oral rinse and chlorhexidine as adjuncts to scaling and root planing in the treatment of periodontal inflammation.			Alshehri M, Alshail F, Aldosary KM, Alamri AA.					2015	RCT (randomization was done by picking a paper from an opaque bag)			Pubmed					90 patients with chronic periodontitis with (1) BOP in at least 30% sites, (2) PD at least 4 mm in 30% sites, (3) no smokers, (4) no alcohol users, (5) no currently using or had a history of antibiotic and/or steroid intake, (6) no pregnancy and/or lactation, (7) no systemic diseases.			Test group 1: SRP + EO-based oral rinse. Test group 2: SRP + CHX oral rinse.		Control group 3: SRP + water oral rinse.				In all groups, periodontal parameters (PI, BOP, and PPD ≥ 4 mm) were comparable at baseline. In Groups-1 and -2, there was a significant reduction in PI (P < 0.01), BOP (P < 0.01), and PD ≥ 4 mm after 7 days and 30 days of follow-up than baseline. In Group-3, there was a significant reduction in PI (P < 0.01) and BOP (P < 0.01) after 7 days of follow-up compared to baseline. There was no differen…					PI, PPD, BOP			None			30 days
Adjunctive Effects of A Piscean Collagen-Based Controlled-Release Chlorhexidine Chip in the Treatment of Chronic Periodontitis: A Clinical and Microbiological Study.			John P, Lazarus F, George JP, Selvam A, Prabhuji ML.					2015	RCT single-blinded in split-mouth (randomization was done using a randomization table (four-unit block size); numbered opaque envelopes were assigned before commencement of the study)			Pubmed					20 patients with chronic periodontitis with (1) two or more sextants (from premolar to molar) containing one tooth that had one PD measuring 6 to 7 mm with BOP, (2) no history of active treatment for chronic periodontitis within the past 5years, (3) no pregnancy and lactation, (4) no consumption of drugs that can affect the periodontium, (5) no diabetes, (6) no smoking, (7) no overhanging restora…			Test group: SRP + CHX chip		Control group: SRP				In the test group there was a statistically significant reduction in the total anaerobic colony count, gingival index and plaque scores from baseline as compared to control sites at all time intervals. An additional 0.8mm reduction in mean probing pocket depth was noted in the test group. Gain in Clinical attachment level was comparable in both groups.					PPD (primary outcome variables), CAL, GI, PI			Microbiologicalanalysis			11 weeks
Evaluation of Turmeric Chip Compared with Chlorhexidine Chip as a Local Drug Delivery Agent in the Treatment of Chronic Periodontitis: A Split Mouth Randomized Controlled Clinical Trial.			Singh A, Sridhar R2 Shrihatti R, Mandloy A.					2018	RCT in split-mouth (randomization was done using predetermined computer- generated randomization scheme to receive balanced random allocation of patients)			Pubmed					40 patients with localized chronic periodontitis, aged 30–50 years, with (1) <30% of the sites assessed in the mouth demonstrate attachment loss and bone loss, (2) 3 test sites with PPD 5-8 mm, (3) no pregnant and lactating, (4) no history of any kind of periodontal therapy within past 6 months, (5) no medically compromised, (6) no sites neighboring recent extraction sites, (7) no teeth showing e…			Test group A: SRP + CHX chip. Test group B: SRP + turmeric chip		Control group C: SRP				On applying statistical analysis, results revealed that there was a significant reduction in all the clinical parameters, that is, PI, GI, PPD, and gain in RAL from baseline to 1 month and 3 months in all the three groups. These results were found to be significantly high in the CHX group and turmeric group than in the SRP group. Also, the results in both the test groups were maintained till the …					PI, GI, PPD, RAL			None			3 months
Clinical and Microbiologic Evaluation of Scaling and Root Planing per Quadrant and One-Stage Full-Mouth Disinfection Associated With Azithromycin or Chlorhexidine: A Clinical Randomized Controlled Trial.			Fonseca DC, Cortelli JR, Cortelli SC, Miranda Cota LO, Machado Costa LC, Moreira Castro MV, Oliveira Azevedo AM, Costa FO.					2015	RCT (randomization was done through a simple random process; the envelopes were sealed, mixed, and numbered sequential)			Pubmed					85 patients with mild and/or chronic periodontitis, aged 35–60 years old, smokers and non smokers, with (1) at least 18 natural teeth, (2) no use of antibiotics or anti- inflammatory drugs or had done so within three months preceding, (3) no making regular use (twice a day) of mouthwashes three months prior, (4) no history of sensitivity to CHX and AZ, (5) no periodontal therapy in the 12 months …			Test group (FMD groups): FMD + CHX (II), FMD + AZ (III). Test groups (QS groups): QS + CHX (II), QS + AZ (III)		Control group (FMD groups): FMD (I). Control group (QS groups): QS (II)				In all groups, it was observed a significant reduction in the % of periodontal diseasedsites (PDS), gingival index, plaque index, and clinical attachment level gain at 90 days of treatment, demonstrating effectiveness of the treatment, independently of the adjuvant. The FMD with CHX group showed higher reduction in probing depth and %PDS, as well as lower total bacterial count than all the other …					PPD, CAL (primary outcome variables), PI, GI, BGI			Microbiologicalanalysis			180 days
Evaluation of new chlorhexidine- and cetylpyridinium chloride-based mouthrinseformulations adjunctive to scaling and root planing: pilot study.			García-Gargallo M, Zurlohe M, Montero E, Alonso B, Serrano J, SanzM, Herrera D.					2017	RCT pilot, parallel, double-blinded (randomization was done using a computer-generated list in blocks of six)			Pubmed					30 systematically healthy patients with chronic periodontitis, age ≥18 years old, with (1) no partial removable prosthesis, (2) no pregnant or lactating, (3) no chronic medication intake, (4) no systemic antimicrobial intake within the last month, (5) no use of antiseptic mouthrinses within the last month, (6) no presence of less than three teeth per quadrant, (7) no smokers of more than 10 cigar…			Test group 2: SRP + new formulated product (0.12% CHX and 0.05% CPC). Test group 3: SRP + new formulatedproduct 0.03% CHX and 0.05% CPC)		Control group 1: SRP + product commercially available (0.12% CHX and 0.05% CPC)				Thirty patients (10 per group) were included. After 1 month, there were significant differences among groups in plaque levels (P = 0.016) as test-1 showed less sites with plaque than test-2 (31.15% [standard error-SE 2.21%] versus 49.39% [SE 4.60%), respectively). No significant differences were found for global patient perception of the product or in adverse effects. Test groups showed better re…					PI (difference of plaque reduction is the primary outcome variable), GR, PPD, CAL, BOP			Microbiologicalanalysis			1 month
Clinical and microbiologic results 12 months after scaling and root planingwith different irrigation solutions in patients with moderate chronic periodontitis: a pilot randomized trial.			Krück C, EickS, Knöfler GU, Purschwitz RE, Jentsch HF.					2012	RCT pilot, unblended (randomization was down using a randomization table)			Pubmed					51 patients with generalized moderate chronic periodontitis, >30 years old, with (1) ≥ 20 teeth; (2) o removable prosthesis, (3) antibiotics or anti-inflammatory drugs during the 6 months before, (4) no pregnant or nursing.			Test group (I): SRP + 0,12% CHX digluconate. Test group (II): SRP + 7,5% povidone-iodine		Control group: SRP + 0,9% NaCl solution				PD, CAL, and BOP were significantly improved in all groups after 12 months (P <0.001 to P = 0.044). No significant differences were seen among the groups for all sites and sites with 4 to 6 mm PD at baseline. The povidone–iodine group had the highest clinical improvements. The counts of A. actinomycetemcomitansand P. gingivalis were significantly reduced after 12 months (P = 0.045 and P = 0.002) …					CAL (primary outcome variable), PPD, BOP			Microbiological analysis (change of micro logic data is the primary outcome variable)			12 months
A novel approach to the use of subgingival controlled-release chlorhexidine delivery in chronic periodontitis: a randomized clinical trial.			Gonzales JR, Harnack L, Schmitt-CorsittoG, BoedekerRH, Chakraborty T, Domann E, Meyle J					2011	RCT placebo-controlled, double-masked (randomization was done using a number was assigned to the patients in the sequence of their presentation to the clinic)			Pubmed					24 systematically healthy patients with chronic periodontitis aged >35 and <65 years with (1) ≥ 12 teeth with PD ≥ 5 mm with BOP, (2) no systemic antibiotic therapy within the past 6 months, (3) no history of allergy to CHX, (4) periodontal treatment within the past 6 months, (5) no pregnancy, (6) no heavy smokers (>10 cigarettes per day).			Test group: SRP + CHX chip		Control group: SRP + placebo				All clinical and serologic parameters improved in both groups over time. There was a significant difference in clinical attachment level (CAL) gain from baseline to 6 months between groups (1.17 mm in the test group versus 0.79 mm in the placebo group) (P <0.05). The treatment with CHX chips showed a greater reduction of the microorganisms of the ‘‘red complex’’ after 1 month (P = 0.02).					PI, PBI, PPD, CAL, BOP e analisi placca (BS, PS); secondaryoutcomevariables			Microbiological analysis (primary outcome variables)			6 months
